# Supplementary material for: A New Immunosuppressive Molecule Emodin Induces both CD4+FoxP3+ and CD8+CD122+ Regulatory T Cells and Suppresses Murine Allograft Rejection
Source: PubMed Central journal article supplement (PMC5682309; doi:10.3389/fimmu.2017.01519), 2017-11-08
Supplement: Presentation_1.pdf [file Presentation_1.pdf]

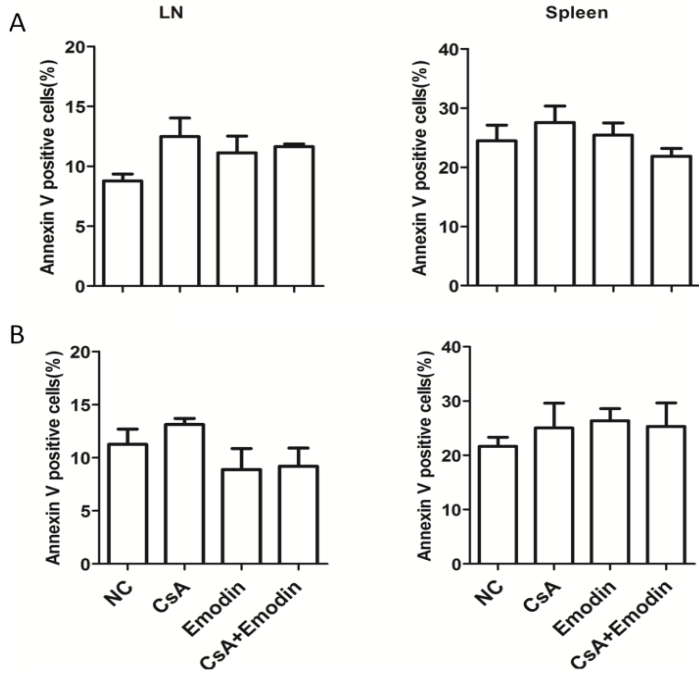

**Supplementary Figure 1**  
**Emodin does not induce the apoptosis of CD4<sup>+</sup> and CD8<sup>+</sup> T cells in vivo**

The apoptosis of CD4<sup>+</sup> (A) and CD8<sup>+</sup> (B) T cells in recipient mice was measured by Annexin V labeling 20 days after skin transplantation and treatments with CsA and/or emodin. LN and spleen cells were harvested and stained for CD4, CD8 and annexin V and their apoptosis was analyzed by flow cytometry. The percentages of Annexin V-positive CD4<sup>+</sup> and CD8<sup>+</sup> T cells are shown. Data are presented as means ± S.D (n=5-6). Results were pooled from three separate experiments. Our findings suggest that administration of emodin does not promote CD4<sup>+</sup> and CD8<sup>+</sup> T cell apoptosis in recipient mice.
